# Supplementary material for: Molecular Characteristics and Serodiagnostic Potential of Dihydrofolate Reductase from Echinococcus granulosus
Source: PubMed Central journal article supplement (PMC5428777; doi:10.1038/s41598-017-00643-5), 2017-03-31
Supplement: 41598_2017_643_MOESM1_ESM.pdf [file 41598_2017_643_MOESM1_ESM.pdf]

---

**Supplementary Information**

**Molecular Characteristics and Serodiagnostic Potential of  
Dihydrofolate Reductase from *Echinococcus granulosus***

Xingju Song<sup>1¶</sup>, Dandan Hu<sup>1¶</sup>, Min Yan<sup>1</sup>, Yu Wang<sup>1</sup>, Ning Wang<sup>1</sup>, Xiaobin Gu<sup>1</sup>,  
Guangyou Yang<sup>1\*</sup>

<sup>1</sup> Department of Parasitology, College of Veterinary Medicine, Sichuan Agricultural  
University, Chengdu, China

\*Corresponding author

E-mail: [guangyou1963@aliyun.com](mailto:guangyou1963@aliyun.com)

¶These authors contributed equally to this work.

# Adult

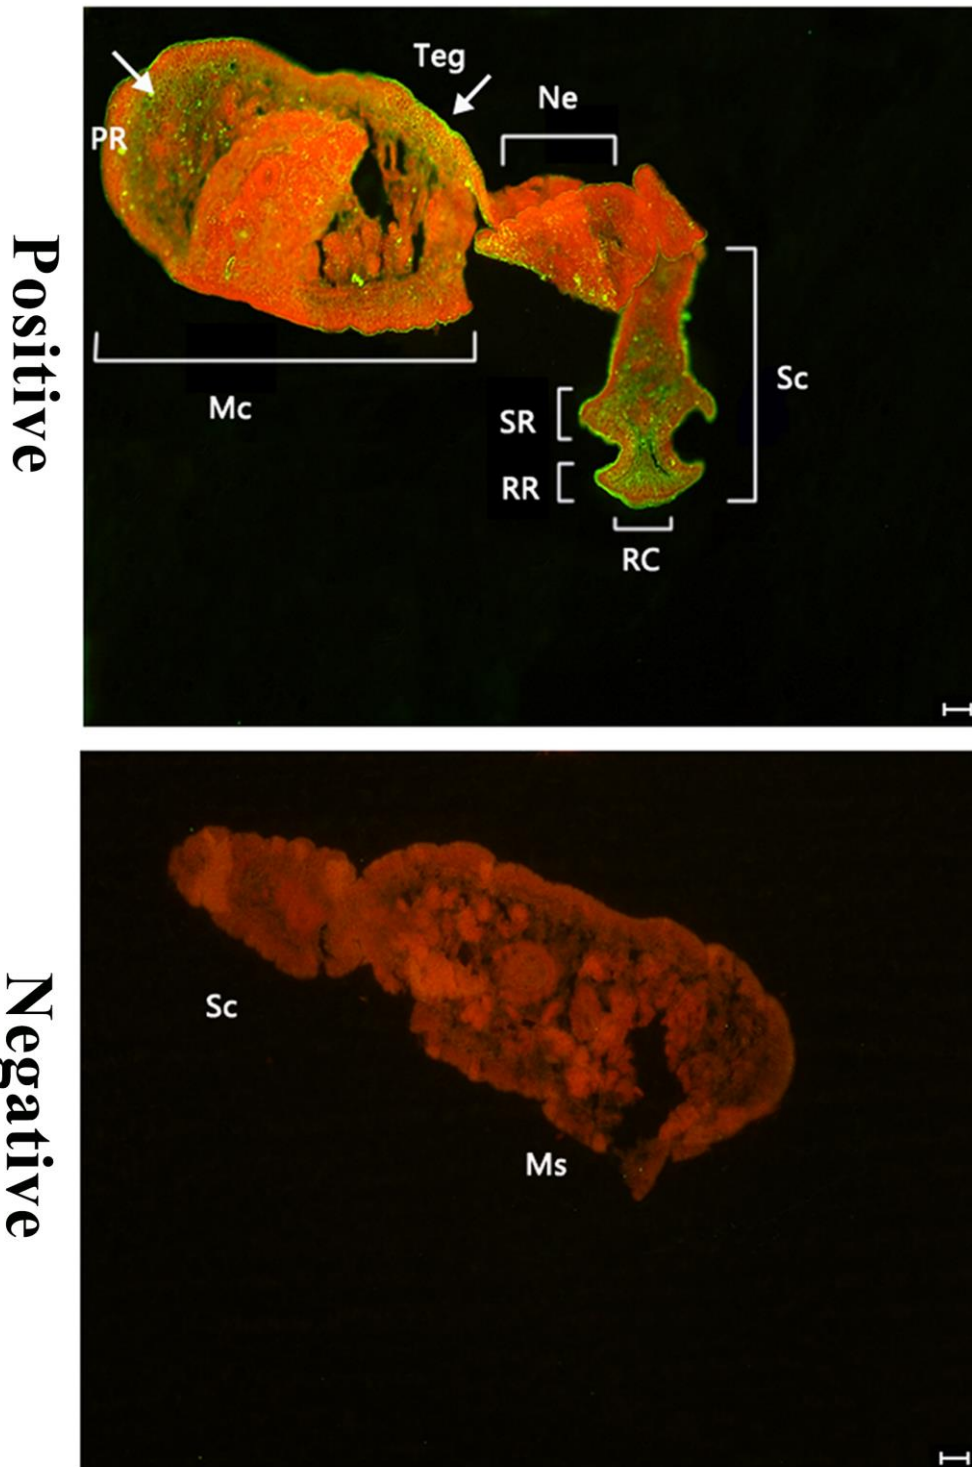

**Figure S1. Immunofluorescent localisation of Eg-DHFR in adult worm.**

Abbreviations: RR, rostellum region; SR, sucker region; RC, rostellar cone; Sc, scolex; Ne, neck; Ms, mature segment. Scale bars: 50  $\mu$ m.
